# Supplementary material
Source: PubMed Central journal article supplement (PMC404119)

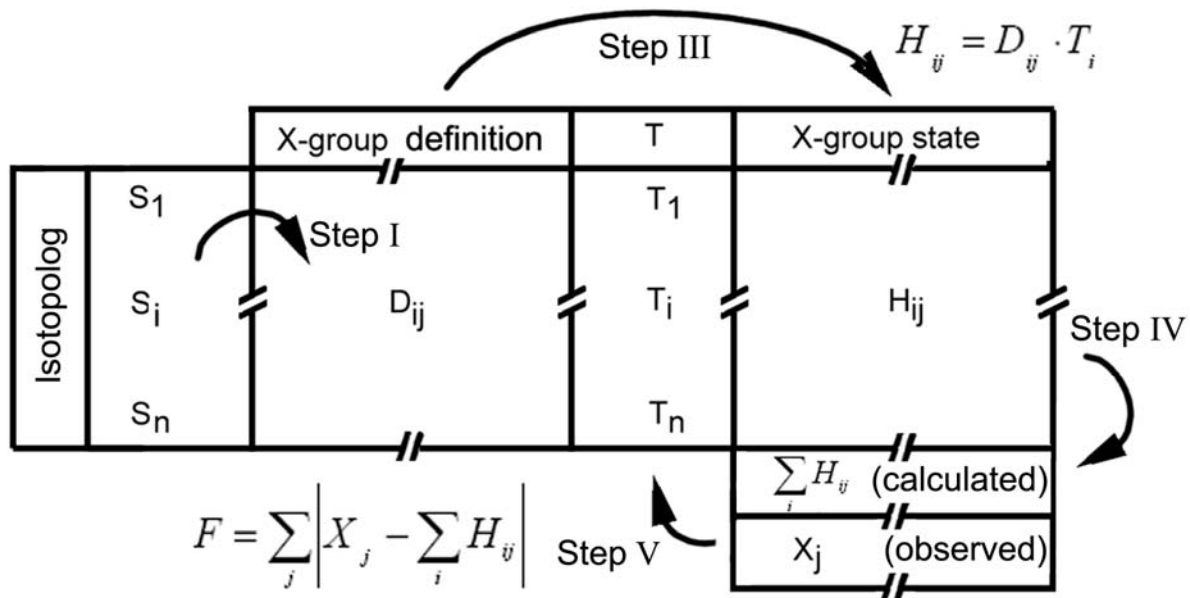

Supplement: pnas_101_17_6764__3.pdf [file pnas_101_17_6764__3.pdf]
